# Supplementary material for: Patient Characteristics and Treatment Patterns in European Pediatric Patients with Psoriasis: A Real-World, Cross-Sectional Study
Source: Springer Nature journal article supplement (doi:10.1007/s13555-022-00761-7), 2022-07-07

## Supplementary Material

### Patient Characteristics and Treatment Patterns in European Pediatric Patients with Psoriasis: A Real-World, Cross-Sectional Study

**Michael Sticherling<sup>a</sup>, Tess McPherson<sup>b</sup>, Raúl de Lucas Laguna<sup>c</sup>, Antonio Costanzo<sup>d,e</sup>, Catherine Reed<sup>f\*</sup>, Esther Artime<sup>g</sup>, Camille Robert<sup>h</sup>, James Lucas<sup>i</sup>, Christopher Schuster<sup>j</sup>, Emmanuel Mahé<sup>k</sup>**

<sup>a</sup>Department of Dermatology, Psoriasis-Center, Deutsches Zentrum Immuntherapie (DZI), University of Erlangen, Erlangen, Germany; <sup>b</sup>Churchill Hospital, Oxford, UK; <sup>c</sup>Servicio de Dermatología Infantil, Hospital Universitario La Paz, Madrid, Spain; <sup>d</sup>Dermatology, Department of Biomedical Sciences, Humanitas University, Pieve Emanuele, Milan, Italy; <sup>e</sup>Dermatology, IRCCS Humanitas Research Hospital, Rozzano, Milan, Italy; <sup>f</sup>Eli Lilly and Company, Bracknell, UK; <sup>g</sup>Eli Lilly and Company, Madrid, Spain; <sup>h</sup>Lilly France SAS, Neuilly Sur Seine, France; <sup>i</sup>Adelphi Real-World, Macclesfield, UK; <sup>j</sup>Eli Lilly Regional Operations GmbH, Vienna, Austria; <sup>k</sup>Service de Dermatologie, Hôpital Victor Dupouy, Argenteuil, France

\*Corresponding Author: Catherine Reed

Email: reed\_catherine@lilly.com

**Supplementary Table 1**      Number of patient report forms completed, by country.

| <b>Country</b> | <b>Overall</b> | <b>Weighing 25–50 kg</b> | <b>Weighing &gt;50 kg</b> |
|----------------|----------------|--------------------------|---------------------------|
| Overall        | 1919           | 772 (40.2%)              | 1147 (59.8%)              |
| France         | 414            | 196 (47.3%)              | 218 (52.7%)               |
| Germany        | 462            | 170 (36.8%)              | 292 (63.2%)               |
| Italy          | 389            | 184 (47.3%)              | 205 (52.7%)               |
| Spain          | 429            | 156 (36.4%)              | 273 (63.6%)               |
| UK             | 225            | 66 (29.3%)               | 159 (70.7%)               |

**Supplementary Table 2** Patient characteristics and history of psoriasis at the time of data collection, by country and weight category.

| Parameter <sup>a</sup>             | France            |                   |                   | Germany           |                   |                   | Italy             |                   |                   | Spain             |                   |                   | UK                |                   |                   |
|------------------------------------|-------------------|-------------------|-------------------|-------------------|-------------------|-------------------|-------------------|-------------------|-------------------|-------------------|-------------------|-------------------|-------------------|-------------------|-------------------|
|                                    | Overall           | 25–50 kg          | >50 kg            |
| Number and percentage of patients  | 414               | 196 (47.3%)       | 218 (52.7%)       | 462               | 170 (36.8%)       | 292 (63.2%)       | 389               | 184 (47.3%)       | 205 (52.7%)       | 429               | 156 (36.4%)       | 273 (63.6%)       | 225               | 66 (29.3%)        | 159 (70.7%)       |
| Current age (years)                |                   |                   |                   |                   |                   |                   |                   |                   |                   |                   |                   |                   |                   |                   |                   |
| Mean ± SD                          | 14.1 ± 2.9        | 12.3 ± 3.0        | 15.6 ± 1.7        | 13.7 ± 2.9        | 10.9 ± 2.5        | 15.4 ± 1.5        | 13.2 ± 3.1        | 11.0 ± 2.8        | 15.1 ± 1.7        | 14.2 ± 2.9        | 11.6 ± 2.8        | 15.6 ± 1.6        | 14.4 ± 2.6        | 11.5 ± 2.5        | 15.6 ± 1.4        |
| Median [IQR]                       | 15.0 [12.0, 16.0] | 13.0 [10.0, 15.0] | 16.0 [15.0, 17.0] | 15.0 [12.0, 16.0] | 11.0 [9.0, 12.0]  | 16.0 [14.0, 16.0] | 14.0 [11.0, 16.0] | 11.0 [9.0, 13.0]  | 16.0 [14.0, 16.0] | 15.0 [12.0, 16.0] | 12.0 [10.0, 14.0] | 16.0 [15.0, 17.0] | 15.0 [13.0, 16.0] | 11.0 [9.0, 13.0]  | 16.0 [15.0, 17.0] |
| Male                               | 230 (55.6%)       | 78 (39.8%)        | 152 (69.7%)       | 266 (57.6%)       | 83 (48.8%)        | 183 (62.7%)       | 229 (58.9%)       | 86 (46.7%)        | 143 (69.8%)       | 240 (55.9%)       | 70 (44.9%)        | 170 (62.3%)       | 126 (56.0%)       | 35 (53.0%)        | 91 (57.2%)        |
| Current body mass index            |                   |                   |                   |                   |                   |                   |                   |                   |                   |                   |                   |                   |                   |                   |                   |
| Mean ± SD                          | 21.1 ± 6.0        | 19.6 ± 5.4        | 22.5 ± 6.2        | 21.1 ± 2.7        | 19.1 ± 2.3        | 22.3 ± 2.3        | 21.4 ± 9.3        | 19.7 ± 3.1        | 22.9 ± 12.2       | 23.0 ± 10.9       | 21.0 ± 12.5       | 24.2 ± 9.8        | 23.8 ± 10.6       | 20.2 ± 6.9        | 25.3 ± 11.5       |
| Median [IQR]                       | 20.3 [19.0, 22.0] | 18.7 [18.0, 20.0] | 22.0 [20.0, 24.0] | 21.0 [19.0, 23.0] | 18.8 [18.0, 20.0] | 22.0 [21.0, 23.0] | 20.8 [19.0, 23.0] | 19.2 [18.0, 21.0] | 22.6 [21.0, 24.0] | 21.6 [20.0, 24.0] | 19.3 [18.0, 21.0] | 22.7 [21.0, 25.0] | 22.1 [20.0, 24.0] | 19.2 [18.0, 20.0] | 23.4 [21.0, 27.0] |
| Type of psoriasis                  |                   |                   |                   |                   |                   |                   |                   |                   |                   |                   |                   |                   |                   |                   |                   |
| Plaque                             | 371 (89.6%)       | 177 (90.3%)       | 194 (89.0%)       | 445 (96.3%)       | 165 (97.1%)       | 280 (95.9%)       | 326 (83.8%)       | 153 (83.2%)       | 173 (84.4%)       | 386 (90.0%)       | 140 (89.7%)       | 246 (90.1%)       | 206 (91.6%)       | 59 (89.4%)        | 147 (92.5%)       |
| Other                              | 43 (10.4%)        | 19 (9.7%)         | 24 (11.0%)        | 17 (3.7%)         | 5 (2.9%)          | 12 (4.1%)         | 63 (16.2%)        | 31 (16.8%)        | 32 (15.6%)        | 43 (10.0%)        | 16 (10.3%)        | 27 (9.9%)         | 19 (8.4%)         | 7 (10.6%)         | 12 (7.5%)         |
| Age at diagnosis (years)           |                   |                   |                   |                   |                   |                   |                   |                   |                   |                   |                   |                   |                   |                   |                   |
| Mean ± SD                          | 10.8 ± 3.6        | 9.7 ± 3.2         | 11.8 ± 3.6        | 11.9 ± 3.1        | 9.7 ± 2.3         | 13.5 ± 2.6        | 11.0 ± 3.1        | 9.3 ± 2.7         | 12.7 ± 2.6        | 11.5 ± 3.9        | 9.1 ± 3.3         | 12.9 ± 3.6        | 12.1 ± 3.1        | 9.0 ± 2.4         | 13.3 ± 2.5        |
| Median [IQR]                       | 11.0 [8.0, 14.0]  | 10.0 [8.0, 12.0]  | 13.0 [10.0, 14.0] | 12.0 [10.0, 15.0] | 10.0 [8.0, 11.0]  | 14.0 [12.0, 15.0] | 11.0 [9.0, 13.0]  | 9.0 [7.0, 11.0]   | 13.0 [11.0, 15.0] | 12.0 [9.0, 15.0]  | 9.0 [7.0, 11.0]   | 14.0 [11.0, 16.0] | 13.0 [9.0, 15.0]  | 9.0 [7.0, 11.0]   | 14.0 [12.0, 15.0] |
| Time since diagnosis (years)       |                   |                   |                   |                   |                   |                   |                   |                   |                   |                   |                   |                   |                   |                   |                   |
| Mean ± SD                          | 3.5 ± 3.2         | 2.9 ± 2.8         | 4.1 ± 3.5         | 1.9 ± 2.2         | 1.3 ± 1.5         | 2.3 ± 2.4         | 2.3 ± 2.2         | 1.9 ± 2.1         | 2.7 ± 2.3         | 3.0 ± 3.0         | 2.7 ± 2.7         | 3.1 ± 3.2         | 2.5 ± 2.1         | 2.5 ± 1.8         | 2.6 ± 2.3         |
| Median [IQR]                       | 2.5 [1.1, 5.1]    | 2.2 [0.5, 4.8]    | 3.1 [1.5, 5.7]    | 1.1 [0.5, 2.6]    | 0.8 [0.4, 1.7]    | 1.4 [0.5, 3.2]    | 1.6 [0.6, 3.1]    | 1.3 [0.5, 2.6]    | 2.1 [1.1, 4.1]    | 2.0 [1.0, 4.0]    | 2.1 [1.0, 3.9]    | 2.0 [1.1, 4.1]    | 1.9 [1.1, 3.4]    | 2.2 [1.1, 3.3]    | 1.9 [1.1, 3.8]    |
| Severity of psoriasis at diagnosis |                   |                   |                   |                   |                   |                   |                   |                   |                   |                   |                   |                   |                   |                   |                   |

|                                  |                  |                  |                   |                  |                  |                  |                  |                  |                  |                 |                 |                 |                 |                 |                  |
|----------------------------------|------------------|------------------|-------------------|------------------|------------------|------------------|------------------|------------------|------------------|-----------------|-----------------|-----------------|-----------------|-----------------|------------------|
| Mild                             | 87 (21.0%)       | 46 (23.5%)       | 41 (18.8%)        | 220 (47.6%)      | 76 (44.7%)       | 144 (49.3%)      | 113 (29.0%)      | 66 (35.9%)       | 47 (22.9%)       | 157 (36.6%)     | 76 (48.7%)      | 81 (29.7%)      | 64 (28.4%)      | 31 (47.0%)      | 33 (20.8%)       |
| Moderate/Severe                  | 327 (79.0%)      | 150 (76.5%)      | 177 (81.2%)       | 242 (52.4%)      | 94 (55.3%)       | 148 (50.7%)      | 276 (71.0%)      | 118 (64.1%)      | 158 (77.1%)      | 272 (63.4%)     | 80 (51.3%)      | 192 (70.3%)     | 161 (71.6%)     | 35 (53.0%)      | 126 (79.2%)      |
| BSA affected at diagnosis (%)    |                  |                  |                   |                  |                  |                  |                  |                  |                  |                 |                 |                 |                 |                 |                  |
| Mean ± SD                        | 21.0 ± 19.6      | 20.7 ± 21.0      | 21.4 ± 18.3       | 12.6 ± 10.3      | 12.5 ± 11.0      | 12.7 ± 9.7       | 21.0 ± 17.1      | 19.8 ± 17.3      | 22.2 ± 16.9      | 10.0 ± 9.0      | 8.7 ± 8.8       | 10.8 ± 9.0      | 12.0 ± 13.0     | 9.6 ± 10.5      | 13.1 ± 13.9      |
| Median [IQR]                     | 15.0 [8.0, 25.0] | 14.0 [8.0, 22.0] | 15.0 [10.0, 25.0] | 10.0 [8.0, 15.0] | 10.0 [6.0, 15.0] | 10.0 [8.0, 15.0] | 15.0 [8.0, 30.0] | 12.5 [8.0, 26.0] | 18.5 [8.0, 35.0] | 8.0 [5.0, 12.0] | 7.5 [4.0, 10.0] | 8.0 [5.0, 15.0] | 9.0 [5.0, 15.0] | 5.0 [2.0, 15.0] | 10.0 [5.0, 15.0] |
| Family history of psoriasis      | 210 (50.7%)      | 95 (48.5%)       | 115 (52.8%)       | 154 (33.3%)      | 60 (35.3%)       | 94 (32.2%)       | 201 (51.7%)      | 85 (46.2%)       | 116 (56.6%)      | 234 (54.5%)     | 83 (53.2%)      | 151 (55.3%)     | 100 (44.4%)     | 30 (45.5%)      | 70 (44.0%)       |
| Diagnosis of psoriatic arthritis | 19 (4.6%)        | 7 (3.6%)         | 12 (5.5%)         | 20 (4.3%)        | 5 (2.9%)         | 15 (5.1%)        | 16 (4.1%)        | 4 (2.2%)         | 12 (5.9%)        | 17 (4.0%)       | 9 (5.8%)        | 8 (2.9%)        | 10 (4.4%)       | 3 (4.5%)        | 7 (4.4%)         |

Values are shown as mean ± standard deviation or n (%) unless otherwise indicated.

<sup>a</sup>Number of patients was lower for some parameters.

BSA, body surface area; IQR, interquartile range; SD, standard deviation.

**Supplementary Table 3** Current treatment characteristics, by type of prescriber and country

| Treatment                                                                               | Overall (N=1919)           |                            |                            | France (N=414)           |                          |                           | Germany (N=462)           |                          |                          | Italy (N=389)             |                          |                          | Spain (N=429)             |                          |                          | UK (N=225)                |              |                          |
|-----------------------------------------------------------------------------------------|----------------------------|----------------------------|----------------------------|--------------------------|--------------------------|---------------------------|---------------------------|--------------------------|--------------------------|---------------------------|--------------------------|--------------------------|---------------------------|--------------------------|--------------------------|---------------------------|--------------|--------------------------|
|                                                                                         | Dermatologist              | Pediatrician               | PCP                        | Dermatologist            | Pediatrician             | PCP                       | Dermatologist             | Pediatrician             | PCP                      | Dermatologist             | Pediatrician             | PCP                      | Dermatologist             | Pediatrician             | PCP                      | Dermatologist             | Pediatrician | PCP                      |
| <b>Type of prescriber</b>                                                               |                            |                            |                            |                          |                          |                           |                           |                          |                          |                           |                          |                          |                           |                          |                          |                           |              |                          |
| <b>Number and percentage of prescribers</b>                                             | 1150 (59.9%)               | 329 (17.1%)                | 440 (22.9%)                | 208 (50.2%)              | 85 (20.5%)               | 121 (29.2%)               | 270 (58.4%)               | 103 (22.3%)              | 89 (19.3%)               | 236 (60.7%)               | 99 (25.4%)               | 54 (13.9%)               | 302 (70.4%)               | 42 (9.8%)                | 85 (19.8%)               | 134 (59.6%)               | 0            | 91 (40.4%)               |
| <b>Severity of psoriasis immediately prior to current/most recent treatment regimen</b> |                            |                            |                            |                          |                          |                           |                           |                          |                          |                           |                          |                          |                           |                          |                          |                           |              |                          |
| Mild                                                                                    |                            |                            |                            |                          |                          |                           |                           |                          |                          |                           |                          |                          |                           |                          |                          |                           |              |                          |
| Moderate/Severe                                                                         | 232 (20.2%)<br>918 (79.8%) | 122 (37.1%)<br>207 (62.9%) | 187 (42.5%)<br>253 (57.5%) | 19 (9.1%)<br>189 (90.9%) | 12 (14.1%)<br>73 (85.9%) | 28 (23.1%)<br>93 (76.9%)  | 83 (30.7%)<br>187 (69.3%) | 45 (43.7%)<br>58 (56.3%) | 52 (58.4%)<br>37 (41.6%) | 37 (15.7%)<br>199 (84.3%) | 44 (44.4%)<br>55 (55.6%) | 19 (35.2%)<br>35 (64.8%) | 72 (23.8%)<br>230 (76.2%) | 21 (50.0%)<br>21 (50.0%) | 44 (51.8%)<br>41 (48.2%) | 21 (15.7%)<br>113 (84.3%) | –            | 44 (48.4%)<br>47 (51.6%) |
| <b>Current severity of psoriasis</b>                                                    |                            |                            |                            |                          |                          |                           |                           |                          |                          |                           |                          |                          |                           |                          |                          |                           |              |                          |
| Mild                                                                                    | 933 (81.1%)                | 254 (77.2%)                | 349 (79.3%)                | 159 (76.4%)              | 50 (58.8%)               | 78 (64.5%)                | 217 (80.4%)               | 90 (84.4%)               | 80 (89.9%)               | 196 (83.1%)               | 80 (80.8%)               | 40 (74.1%)               | 246 (81.5%)               | 34 (81.0%)               | 76 (89.4%)               | 115 (85.8%)               | –            | 75 (82.4%)               |
| Moderate/Severe                                                                         | 217 (18.9%)                | 75 (22.8%)                 | 91 (20.7%)                 | 49 (23.6%)               | 35 (41.2%)               | 43 (35.5%)                | 53 (19.6%)                | 13 (12.6%)               | 9 (10.1%)                | 40 (16.9%)                | 19 (19.2%)               | 14 (25.9%)               | 56 (18.5%)                | 8 (19.0%)                | 9 (10.6%)                | 19 (14.2%)                | –            | 16 (17.6%)               |
| <b>Topical only</b>                                                                     |                            |                            |                            |                          |                          |                           |                           |                          |                          |                           |                          |                          |                           |                          |                          |                           |              |                          |
| Topical corticosteroid                                                                  | 499 (43.4%)<br>301 (26.2%) | 248 (75.4%)<br>117 (35.6%) | 386 (87.7%)<br>230 (52.3%) | 74 (35.6%)<br>68 (32.7%) | 61 (71.8%)<br>20 (23.5%) | 104 (86.0%)<br>80 (66.1%) | 151 (55.9%)<br>68 (25.2%) | 79 (76.7%)<br>38 (36.9%) | 74 (83.1%)<br>37 (41.6%) | 85 (36.0%)<br>49 (20.8%)  | 83 (83.8%)<br>31 (31.3%) | 41 (75.9%)<br>24 (44.4%) | 140 (46.4%)<br>90 (29.8%) | 25 (59.5%)<br>28 (66.7%) | 82 (96.5%)<br>43 (50.6%) | 49 (36.6%)<br>26 (19.4%)  | –            | 85 (93.4%)<br>46 (50.5%) |
| Topical non-corticosteroid                                                              | 258 (22.4%)                | 156 (47.4%)                | 155 (35.2%)                | 39 (18.8%)               | 31 (36.5%)               | 24 (19.8%)                | 117 (43.3%)               | 53 (51.5%)               | 49 (55.1%)               | 48 (20.3%)                | 68 (68.7%)               | 20 (37.0%)               | 29 (9.6%)                 | 4 (9.5%)                 | 18 (21.2%)               | 25 (18.7%)                | –            | 44 (48.4%)               |
| Topical combination product                                                             | 311 (27.0%)                | 86 (26.1%)                 | 101 (23.0%)                | 30 (14.4%)               | 45 (52.9%)               | 19 (15.7%)                | 80 (29.6%)                | 10 (9.7%)                | 14 (15.7%)               | 45 (19.1%)                | 17 (17.2%)               | 19 (35.2%)               | 105 (34.8%)               | 14 (33.3%)               | 26 (30.6%)               | 51 (38.1%)                | –            | 23 (25.3%)               |
| <b>Phototherapy (PUVA, UVB)</b>                                                         | 77 (6.7%)                  | 37 (11.2%)                 | 25 (5.7%)                  | 15 (7.2%)                | 8 (9.4%)                 | 5 (4.1%)                  | 21 (7.8%)                 | 9 (8.7%)                 | 10 (11.2%)               | 16 (6.8%)                 | 5 (5.1%)                 | 8 (14.8%)                | 17 (5.6%)                 | 15 (35.7%)               | 1 (1.2%)                 | 8 (6.0%)                  | –            | 1 (1.1%)                 |
| <b>Conventional systemics</b>                                                           |                            |                            |                            |                          |                          |                           |                           |                          |                          |                           |                          |                          |                           |                          |                          |                           |              |                          |
| Methotrexate                                                                            | 167 (14.5%)<br>96 (8.5%)   | 23 (7.0%)<br>22 (6.7%)     | 18 (4.1%)<br>12 (2.7%)     | 33 (15.9%)<br>20 (9.9%)  | 4 (4.7%)<br>3 (3.6%)     | 5 (4.1%)<br>3 (2.5%)      | 21 (7.8%)<br>20 (7.4%)    | 7 (6.8%)<br>7 (6.8%)     | 6 (6.7%)<br>3 (3.4%)     | 35 (14.8%)<br>8 (3.5%)    | 4 (4.0%)<br>4 (4.0%)     | 3 (5.6%)<br>3 (5.6%)     | 38 (12.6%)<br>23 (7.6%)   | 8 (19.0%)<br>8 (19.0%)   | 1 (1.2%)<br>1 (1.2%)     | 40 (29.9%)<br>25 (18.8%)  | –            | 3 (3.3%)<br>2 (2.2%)     |
| Cyclosporine                                                                            | 46 (4.1%)                  | 1 (0.3%)                   | 3 (0.7%)                   | 2 (1.0%)                 | 0                        | 1 (0.8%)                  | 0                         | 0                        | 1 (1.1%)                 | 27 (11.9%)                | 0                        | 0                        | 10 (3.3%)                 | 1 (2.4%)                 | 0                        | 7 (5.3%)                  | –            | 1 (1.1%)                 |
| Acitretin                                                                               | 23 (2.0%)                  | 1 (0.3%)                   | 1 (0.2%)                   | 11 (5.4%)                | 1 (1.2%)                 | 1 (0.8%)                  | 0                         | 0                        | 0                        | 0                         | 0                        | 0                        | 5 (1.7%)                  | 0                        | 0                        | 7 (5.3%)                  | –            | 0                        |
| Fumarate                                                                                | 3 (0.3%)                   | 0                          | 2 (0.5%)                   | 0                        | 0                        | 0                         | 1 (0.4%)                  | 0                        | 2 (2.2%)                 | 0                         | 0                        | 0                        | 1 (0.3%)                  | 0                        | 0                        | 1 (0.8%)                  | –            | 0                        |
| <b>Biologics</b>                                                                        |                            |                            |                            |                          |                          |                           |                           |                          |                          |                           |                          |                          |                           |                          |                          |                           |              |                          |
| Etanercept                                                                              | 407 (35.4%)                | 44 (13.4%)                 | 15 (3.4%)                  | 90 (43.3%)               | 16 (18.8%)               | 8 (6.6%)                  | 82 (30.4%)                | 9 (8.7%)                 | 1 (1.1%)                 | 90 (38.1%)                | 9 (9.1%)                 | 3 (5.6%)                 | 107 (35.4%)               | 10 (23.8%)               | 1 (1.2%)                 | 38 (28.4%)                | –            | 2 (2.2%)                 |
| Etanercept or biosimilar                                                                | 67 (5.9%)                  | 9 (2.7%)                   | 4 (0.9%)                   | 18 (8.9%)                | 5 (6.0%)                 | 2 (1.7%)                  | 11 (4.1%)                 | 0                        | 0                        | 15 (6.6%)                 | 2 (2.0%)                 | 1 (1.9%)                 | 21 (7.0%)                 | 2 (4.8%)                 | 1 (1.2%)                 | 2 (1.5%)                  | –            | 0                        |
| Adalimumab                                                                              | 84 (7.3%)                  | 15 (4.6%)                  | 8 (1.8%)                   | 20 (9.6%)                | 7 (8.2%)                 | 5 (4.1%)                  | 14 (5.2%)                 | 2 (1.9%)                 | 0                        | 23 (9.7%)                 | 2 (2.0%)                 | 2 (3.7%)                 | 24 (7.9%)                 | 4 (9.5%)                 | 1 (1.2%)                 | 3 (2.2%)                  | –            | 0                        |
| Adalimumab or biosimilar                                                                | 190 (16.8%)                | 25 (7.6%)                  | 6 (1.4%)                   | 50 (24.8%)               | 6 (7.1%)                 | 3 (2.5%)                  | 40 (14.9%)                | 6 (5.8%)                 | 1 (1.1%)                 | 40 (17.7%)                | 7 (7.1%)                 | 1 (1.9%)                 | 41 (13.6%)                | 6 (14.3%)                | 0                        | 19 (14.3%)                | –            | 1 (1.1%)                 |

|                                 |                                |                             |                            |                               |                            |                  |                               |                  |                  |                              |                  |                  |                                |                   |             |                              |        |                            |
|---------------------------------|--------------------------------|-----------------------------|----------------------------|-------------------------------|----------------------------|------------------|-------------------------------|------------------|------------------|------------------------------|------------------|------------------|--------------------------------|-------------------|-------------|------------------------------|--------|----------------------------|
|                                 | 232<br>(20.2%)<br>91<br>(8.0%) | 26<br>(7.9%)<br>3<br>(0.9%) | 6<br>(1.4%)<br>1<br>(0.2%) | 53<br>(25.5%)<br>17<br>(8.4%) | 6<br>(7.1%)<br>3<br>(3.6%) | 3<br>(2.5%)<br>0 | 50<br>(18.5%)<br>18<br>(6.7%) | 7<br>(6.8%)<br>0 | 1<br>(1.1%)<br>0 | 59<br>(25.0%)<br>8<br>(3.5%) | 7<br>(7.1%)<br>0 | 1<br>(1.9%)<br>0 | 44<br>(14.6%)<br>39<br>(13.0%) | 6<br>(14.3%)<br>0 | 0<br>0      | 26<br>(19.4%)<br>9<br>(6.8%) | —<br>— | 1<br>(1.1%)<br>1<br>(1.1%) |
| <b>Ever received a biologic</b> | 435<br>(37.8%)                 | 49<br>(14.9%)               | 17<br>(3.9%)               | 99<br>(47.6%)                 | 21<br>(24.7%)              | 10<br>(8.3%)     | 85<br>(31.5%)                 | 9<br>(8.7%)      | 1<br>(1.1%)      | 97<br>(41.1%)                | 9<br>(9.1%)      | 3<br>(5.6%)      | 115<br>(38.1%)                 | 10<br>(23.8%)     | 1<br>(1.2%) | 39<br>(29.1%)                | —      | 2<br>(2.2%)                |

Values are shown as n (%).

PUVA, psoralen and ultraviolet A; UVB, ultraviolet B.

**Supplementary Table 4** Current treatment characteristics, by country and weight category.

| Treatment <sup>a</sup>                                                                  | France         |                |                | Germany        |                |                | Italy          |                |                | Spain          |                |                | UK             |               |                |
|-----------------------------------------------------------------------------------------|----------------|----------------|----------------|----------------|----------------|----------------|----------------|----------------|----------------|----------------|----------------|----------------|----------------|---------------|----------------|
|                                                                                         | Overall        | 25–50 kg       | >50 kg         | Overall        | 25–50 kg      | >50 kg         |
| <b>Number and percentage of patients</b>                                                | 414            | 196<br>(47.3%) | 218<br>(52.7%) | 462            | 170<br>(36.8%) | 292<br>(63.2%) | 389            | 184<br>(47.3%) | 205<br>(52.7%) | 429            | 156<br>(36.4%) | 273<br>(63.6%) | 225            | 66<br>(29.3%) | 159<br>(70.7%) |
| <b>Severity of psoriasis immediately prior to current/most recent treatment regimen</b> |                |                |                |                |                |                |                |                |                |                |                |                |                |               |                |
| Mild                                                                                    | 59<br>(14.3%)  | 35<br>(17.9%)  | 24<br>(11.0%)  | 180<br>(39.0%) | 69<br>(40.6%)  | 111<br>(38.0%) | 100<br>(25.7%) | 60<br>(32.6%)  | 40<br>(19.5%)  | 137<br>(31.9%) | 68<br>(43.6%)  | 69<br>(25.3%)  | 65<br>(28.9%)  | 29<br>(43.9%) | 36<br>(22.6%)  |
| Moderate/Severe                                                                         | 355<br>(85.7%) | 161<br>(82.1%) | 194<br>(89.0%) | 282<br>(61.0%) | 101<br>(59.4%) | 181<br>(62.0%) | 289<br>(74.3%) | 124<br>(67.4%) | 165<br>(80.5%) | 292<br>(68.1%) | 88<br>(56.4%)  | 204<br>(74.7%) | 160<br>(71.1%) | 37<br>(56.1%) | 123<br>(77.4%) |
| <b>Current severity of psoriasis</b>                                                    |                |                |                |                |                |                |                |                |                |                |                |                |                |               |                |
| Mild                                                                                    | 287<br>(69.3%) | 130<br>(66.3%) | 157<br>(72.0%) | 387<br>(83.8%) | 142<br>(83.5%) | 245<br>(83.9%) | 316<br>(81.2%) | 155<br>(84.2%) | 161<br>(78.5%) | 356<br>(83.0%) | 135<br>(86.5%) | 221<br>(81.0%) | 190<br>(84.4%) | 56<br>(84.8%) | 134<br>(84.3%) |
| Moderate/Severe                                                                         | 127<br>(30.7%) | 66<br>(33.7%)  | 61<br>(28.0%)  | 75<br>(16.2%)  | 28<br>(16.5%)  | 47<br>(16.1%)  | 73<br>(18.8%)  | 29<br>(15.8%)  | 44<br>(21.5%)  | 73<br>(17.0%)  | 21<br>(13.5%)  | 52<br>(19.0%)  | 35<br>(15.6%)  | 10<br>(15.2%) | 25<br>(15.7%)  |
| <b>Topical only</b>                                                                     | 239<br>(57.7%) | 128<br>(65.3%) | 111<br>(50.9%) | 304<br>(65.8%) | 135<br>(79.4%) | 169<br>(57.9%) | 209<br>(53.7%) | 127<br>(69.0%) | 82<br>(40.0%)  | 247<br>(57.6%) | 104<br>(66.7%) | 143<br>(52.4%) | 134<br>(59.6%) | 49<br>(74.2%) | 85<br>(53.5%)  |
| Topical corticosteroid <sup>b</sup>                                                     | 168<br>(41.4%) | 90<br>(46.4%)  | 78<br>(36.8%)  | 143<br>(31.0%) | 55<br>(32.4%)  | 88<br>(30.2%)  | 104<br>(27.4%) | 62<br>(34.6%)  | 42<br>(21.0%)  | 161<br>(37.6%) | 68<br>(43.6%)  | 93<br>(34.2%)  | 72<br>(32.1%)  | 25<br>(37.9%) | 47<br>(29.7%)  |
| Topical non-corticosteroid <sup>b</sup>                                                 | 94<br>(23.2%)  | 45<br>(23.2%)  | 49<br>(23.1%)  | 219<br>(47.5%) | 108<br>(63.5%) | 111<br>(38.1%) | 136<br>(35.9%) | 71<br>(39.7%)  | 65<br>(32.5%)  | 51<br>(11.9%)  | 17<br>(10.9%)  | 34<br>(12.5%)  | 69<br>(30.8%)  | 25<br>(37.9%) | 44<br>(27.8%)  |
| Topical combination product <sup>b</sup>                                                | 94<br>(23.2%)  | 47<br>(24.2%)  | 47<br>(22.2%)  | 104<br>(22.6%) | 28<br>(16.5%)  | 76<br>(26.1%)  | 81<br>(21.4%)  | 38<br>(21.2%)  | 43<br>(21.5%)  | 145<br>(33.9%) | 57<br>(36.5%)  | 88<br>(32.4%)  | 74<br>(33.0%)  | 24<br>(36.4%) | 50<br>(31.6%)  |
| <b>Phototherapy (PUVA, UVB)<sup>b</sup></b>                                             | 28 (6.9%)      | 16 (8.2%)      | 12 (5.7%)      | 40 (8.7%)      | 14 (8.2%)      | 26 (8.9%)      | 29 (7.7%)      | 12 (6.7%)      | 17 (8.5%)      | 33 (7.7%)      | 13 (8.3%)      | 20 (7.4%)      | 9 (4.0%)       | 2 (3.0%)      | 7 (4.4%)       |
| <b>Conventional systemics</b>                                                           | 32 (7.7%)      | 12 (6.1%)      | 20 (9.2%)      | 32 (6.9%)      | 9 (5.3%)       | 23 (7.9%)      | 40 (10.3%)     | 15 (8.2%)      | 25 (12.2%)     | 39 (9.1%)      | 15 (9.6%)      | 24 (8.8%)      | 43 (19.1%)     | 5 (7.6%)      | 38 (23.9%)     |
| Methotrexate <sup>b</sup>                                                               | 26 (6.4%)      | 9 (4.6%)       | 17 (8.0%)      | 30 (6.5%)      | 7 (4.1%)       | 23 (7.9%)      | 15 (4.0%)      | 7 (3.9%)       | 8 (4.0%)       | 32 (7.5%)      | 16 (10.3%)     | 16 (5.9%)      | 27 (12.1%)     | 4 (6.1%)      | 23 (14.6%)     |

|                                       |             |            |            |            |           |            |             |            |            |             |            |            |            |            |            |
|---------------------------------------|-------------|------------|------------|------------|-----------|------------|-------------|------------|------------|-------------|------------|------------|------------|------------|------------|
| Cyclosporine <sup>b</sup>             | 3 (0.7%)    | 0          | 3 (1.4%)   | 1 (0.2%)   | 1 (0.6%)  | 0          | 27 (7.1%)   | 8 (4.5%)   | 19 (9.5%)  | 11 (2.6%)   | 6 (3.8%)   | 5 (1.8%)   | 8 (3.6%)   | 0          | 8 (5.1%)   |
| Acitretin <sup>b</sup>                | 13 (3.2%)   | 5 (2.6%)   | 8 (3.8%)   | 0          | 0         | 0          | 0           | 0          | 0          | 5 (1.2%)    | 0          | 5 (1.8%)   | 7 (3.1%)   | 1 (1.5%)   | 6 (3.8%)   |
| Fumarate <sup>b</sup>                 | 0           | 0          | 0          | 3 (0.7%)   | 1 (0.6%)  | 2 (0.7%)   | 0           | 0          | 0          | 1 (0.2%)    | 0          | 1 (0.4%)   | 1 (0.4%)   | 0          | 1 (0.6%)   |
| <b>Biologics</b>                      | 114 (27.5%) | 41 (20.9%) | 73 (33.5%) | 92 (19.9%) | 14 (8.2%) | 78 (26.7%) | 102 (26.2%) | 26 (14.1%) | 76 (37.1%) | 118 (27.5%) | 30 (19.2%) | 88 (32.2%) | 40 (17.8%) | 10 (15.2%) | 30 (18.9%) |
| Etanercept <sup>b</sup>               | 25 (6.2%)   | 11 (5.7%)  | 14 (6.6%)  | 11 (2.4%)  | 1 (0.6%)  | 10 (3.4%)  | 18 (4.7%)   | 3 (1.7%)   | 15 (7.5%)  | 24 (5.6%)   | 10 (6.4%)  | 14 (5.1%)  | 2 (0.9%)   | 2 (3.0%)   | 0          |
| Etanercept or biosimilar <sup>b</sup> | 32 (7.9%)   | 16 (8.2%)  | 16 (7.5%)  | 16 (3.5%)  | 1 (0.6%)  | 15 (5.2%)  | 27 (7.1%)   | 7 (3.9%)   | 20 (10.0%) | 29 (6.8%)   | 12 (7.7%)  | 17 (6.3%)  | 3 (1.3%)   | 2 (3.0%)   | 1 (0.6%)   |
| Adalimumab <sup>b</sup>               | 59 (14.5%)  | 16 (8.2%)  | 43 (20.3%) | 47 (10.2%) | 8 (4.7%)  | 39 (13.4%) | 48 (12.7%)  | 16 (8.9%)  | 32 (16.0%) | 47 (11.0%)  | 12 (7.7%)  | 35 (12.9%) | 20 (8.9%)  | 8 (12.1%)  | 12 (7.6%)  |
| Adalimumab or biosimilar <sup>b</sup> | 62 (15.3%)  | 17 (8.8%)  | 45 (21.2%) | 58 (12.6%) | 11 (6.5%) | 47 (16.2%) | 67 (17.7%)  | 18 (10.1%) | 49 (24.5%) | 50 (11.7%)  | 12 (7.7%)  | 38 (14.0%) | 27 (12.1%) | 8 (12.1%)  | 0          |
| Ustekinumab <sup>b</sup>              | 20 (4.9%)   | 8 (4.1%)   | 12 (5.7%)  | 18 (3.9%)  | 2 (1.2%)  | 16 (5.5%)  | 8 (2.1%)    | 1 (0.6%)   | 7 (3.5%)   | 39 (9.1%)   | 6 (3.8%)   | 33 (12.1%) | 10 (4.5%)  | 0          | 10 (6.3%)  |
| <b>Ever received a biologic</b>       | 130 (31.4%) | 47 (24.0%) | 83 (38.1%) | 95 (20.6%) | 14 (8.2%) | 81 (27.7%) | 109 (28.0%) | 30 (16.3%) | 79 (38.5%) | 126 (29.4%) | 34 (21.8%) | 92 (33.7%) | 41 (18.2%) | 10 (15.2%) | 31 (19.5%) |

Values are shown as n (%).

<sup>a</sup>Number of patients was lower for some parameters.

<sup>b</sup>Percentages based on the number of patients with a treatment history: number of patients with a treatment history overall, for patients weighing 25–50 kg and for patients weighing >50 kg = 406, 194, 212 for France; 461, 170, 291 for Germany; 379, 179, 200 for Italy; 428, 156, 272 for Spain; and 224, 66, 158 for the UK.

PUVA, psoralen and ultraviolet A; UVB, ultraviolet B.



**Supplementary Table 5** Length of time in weeks on biologic treatment for patients currently taking biologics, overall and by weight category for each country.

| Country        | Overall           | Weighing 25–50 kg | Weighing >50 kg   |
|----------------|-------------------|-------------------|-------------------|
| <b>France</b>  |                   |                   |                   |
| n              | 112               | 40                | 72                |
| Mean ± SD      | 34.3 ± 28.2       | 27.0 ± 21.8       | 38.3 ± 30.6       |
| Median [IQR]   | 24.0 [16.0, 48.0] | 18.0 [12.0, 41.0] | 30.0 [16.0, 52.0] |
| <b>Germany</b> |                   |                   |                   |
| n              | 91                | 14                | 77                |
| Mean ± SD      | 26.1 ± 22.3       | 28.2 ± 19.0       | 25.7 ± 23.0       |
| Median [IQR]   | 20.0 [10.0, 36.0] | 21.5 [14.0, 47.0] | 20.0 [10.0, 36.0] |
| <b>Italy</b>   |                   |                   |                   |
| n              | 102               | 26                | 76                |
| Mean ± SD      | 35.7 ± 29.3       | 39.2 ± 27.2       | 34.6 ± 39.9       |
| Median [IQR]   | 24.0 [12.0, 50.0] | 35.0 [12.0, 52.0] | 24.0 [12.0, 48.0] |
| <b>Spain</b>   |                   |                   |                   |
| n              | 118               | 30                | 88                |
| Mean ± SD      | 32.7 ± 29.8       | 40.0 ± 34.2       | 30.2 ± 19.8       |
| Median [IQR]   | 24.0 [12.0, 50.0] | 31.0 [12.0, 52.0] | 24.0 [12.0, 48.0] |
| <b>UK</b>      |                   |                   |                   |
| n              | 40                | 10                | 30                |
| Mean ± SD      | 37.4 ± 16.9       | 36.1 ± 17.3       | 37.9 ± 17.1       |
| Median [IQR]   | 35.5 [24.0, 52.0] | 35.0 [22.0, 52.0] | 35.5 [24.0, 52.0] |

IQR, interquartile range; SD, standard deviation.

**Supplementary Fig. 1**

Number and percentage of physicians participating in

the survey, by country. PCP, primary care physician.

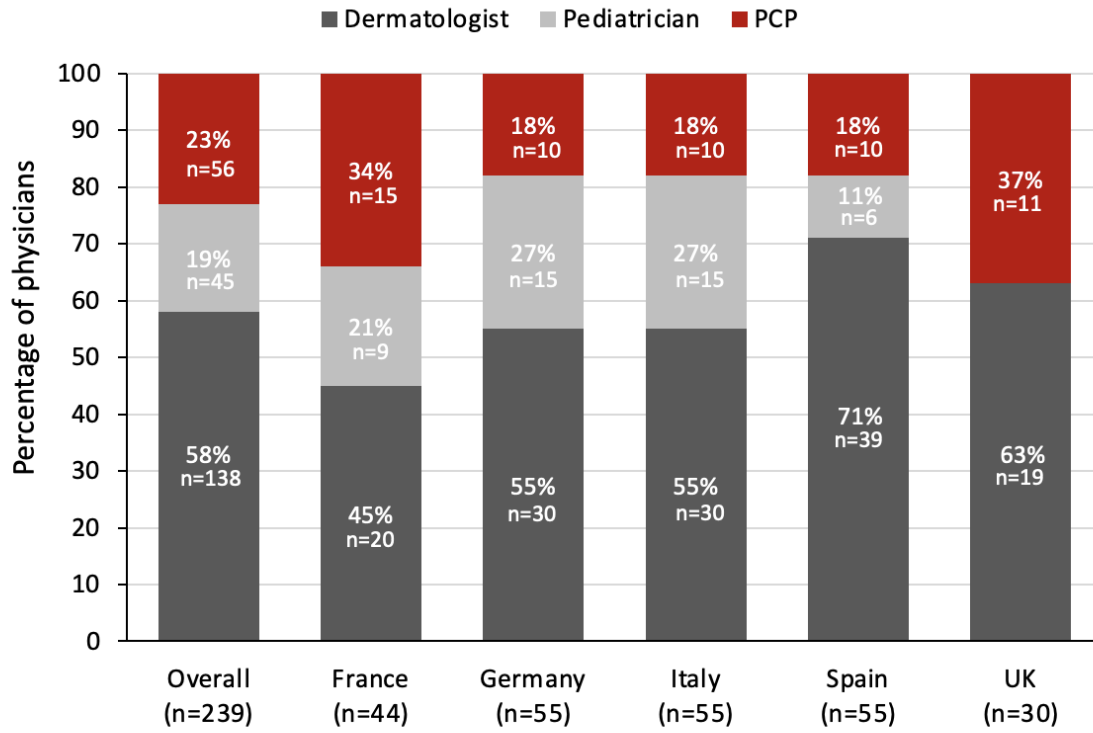

**Supplementary Fig. 2**

Treatments received according to disease severity prior

to the initiation of current treatment, by weight category for (a) France, (b) Germany, (c) Italy, (d) Spain, and (e) the UK.

**(a) France**

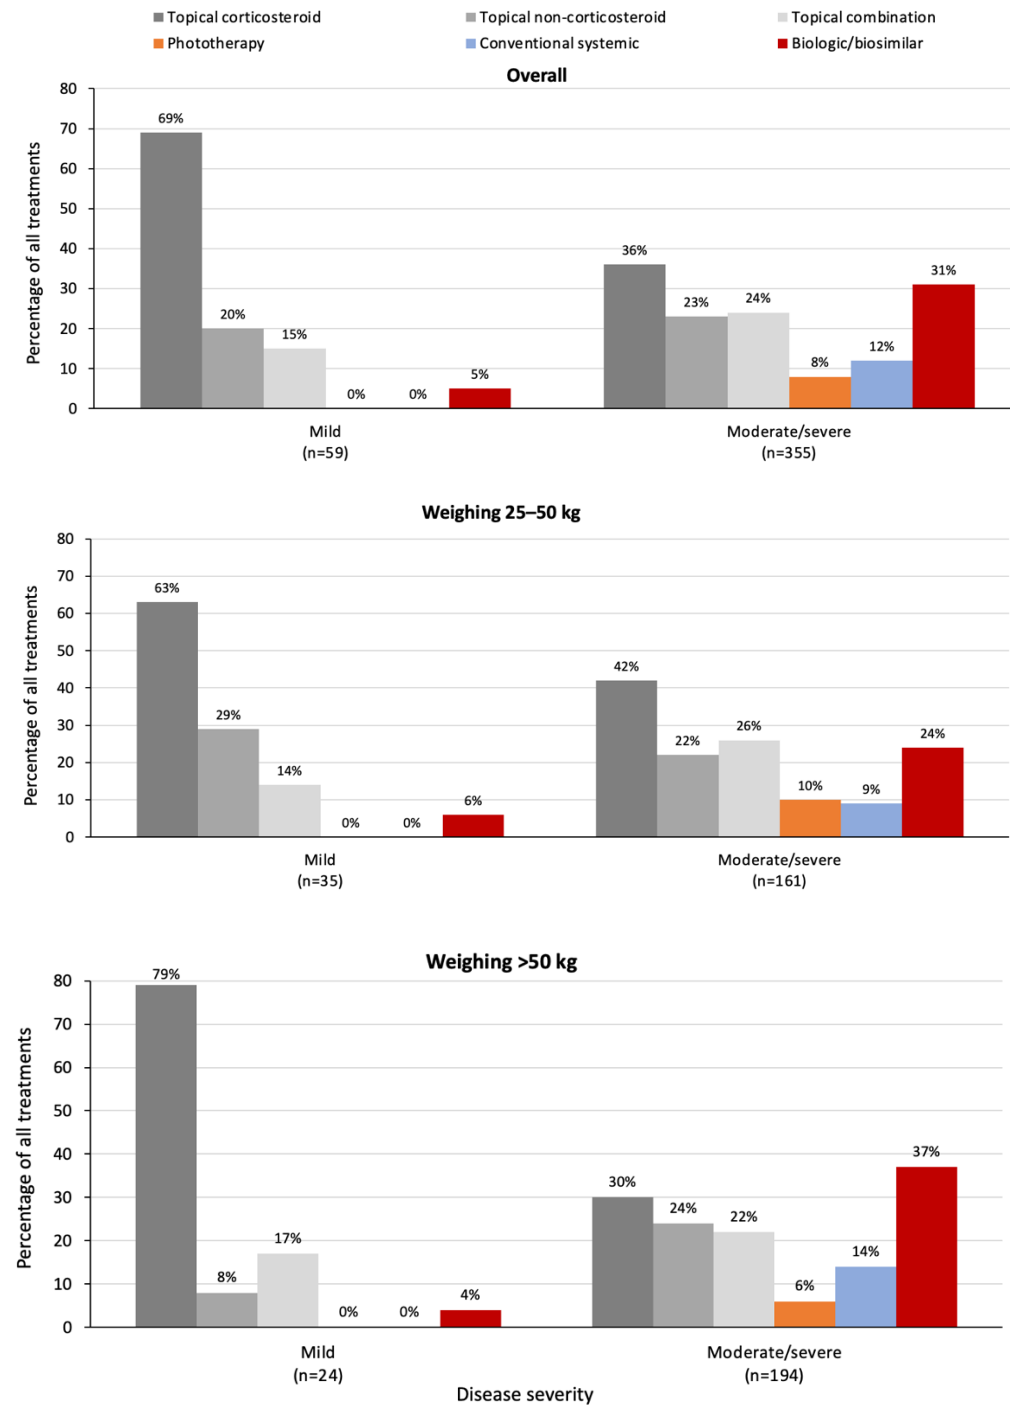

(b) Germany

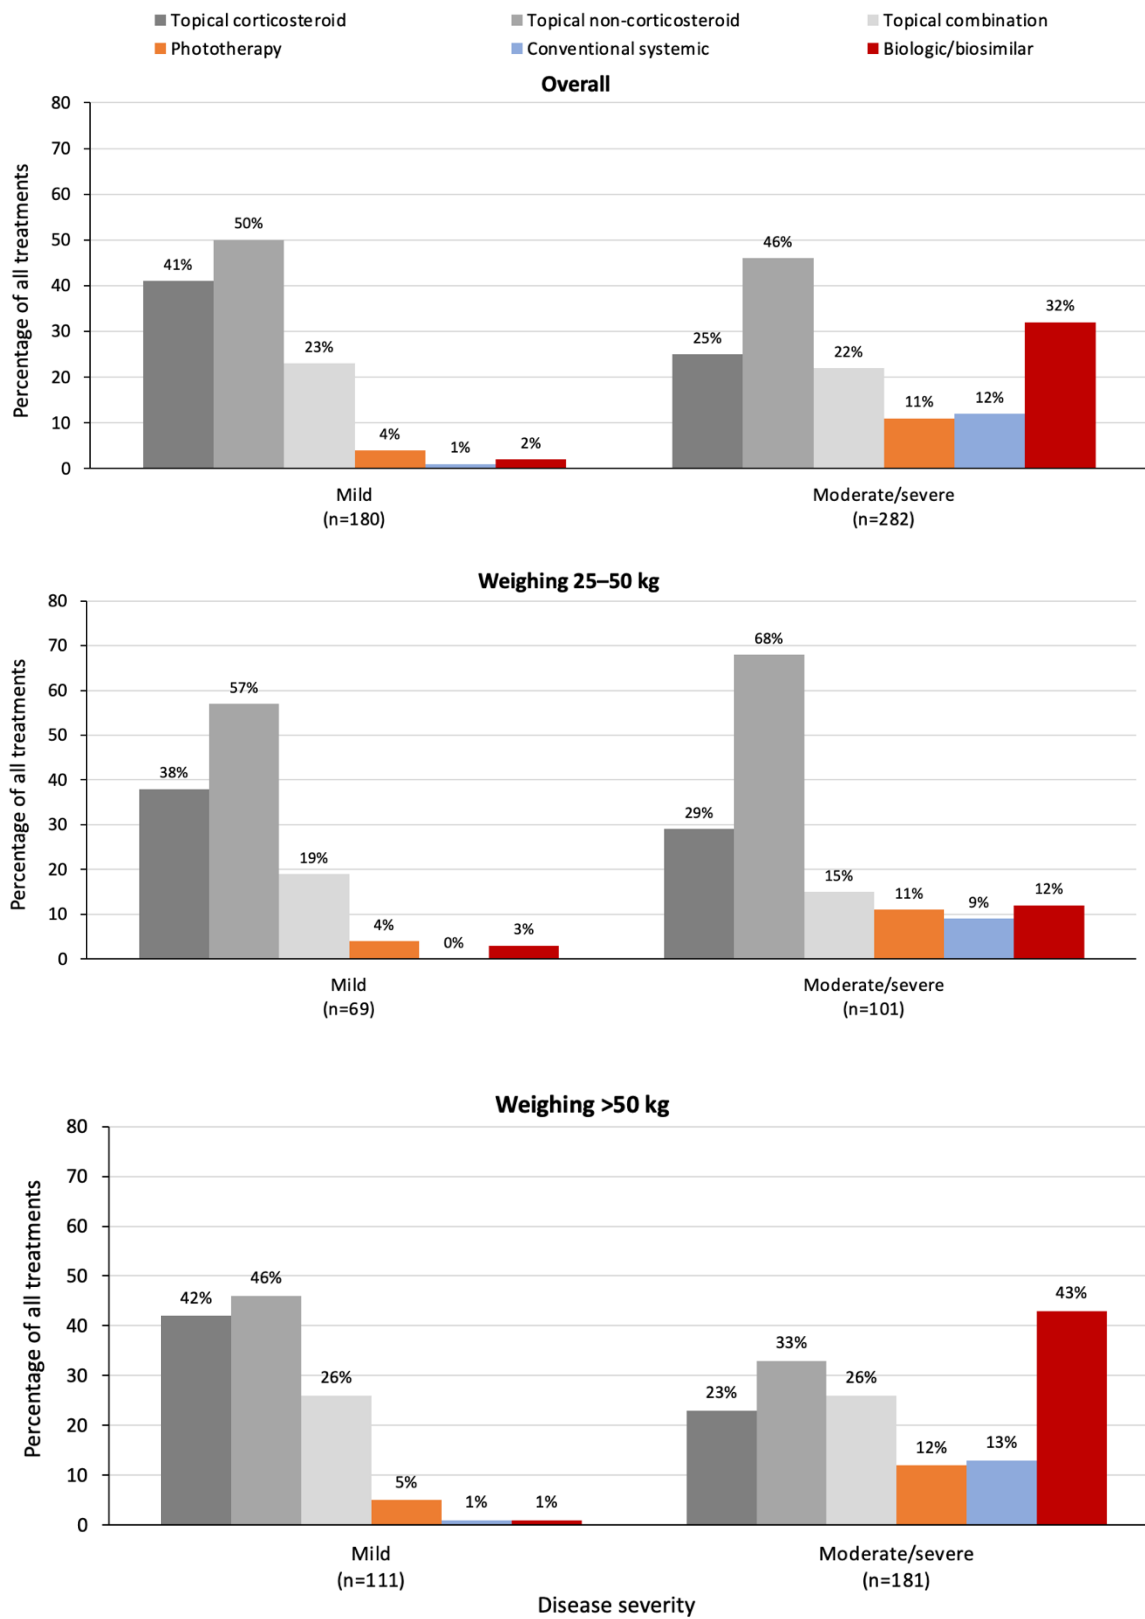

(c) Italy

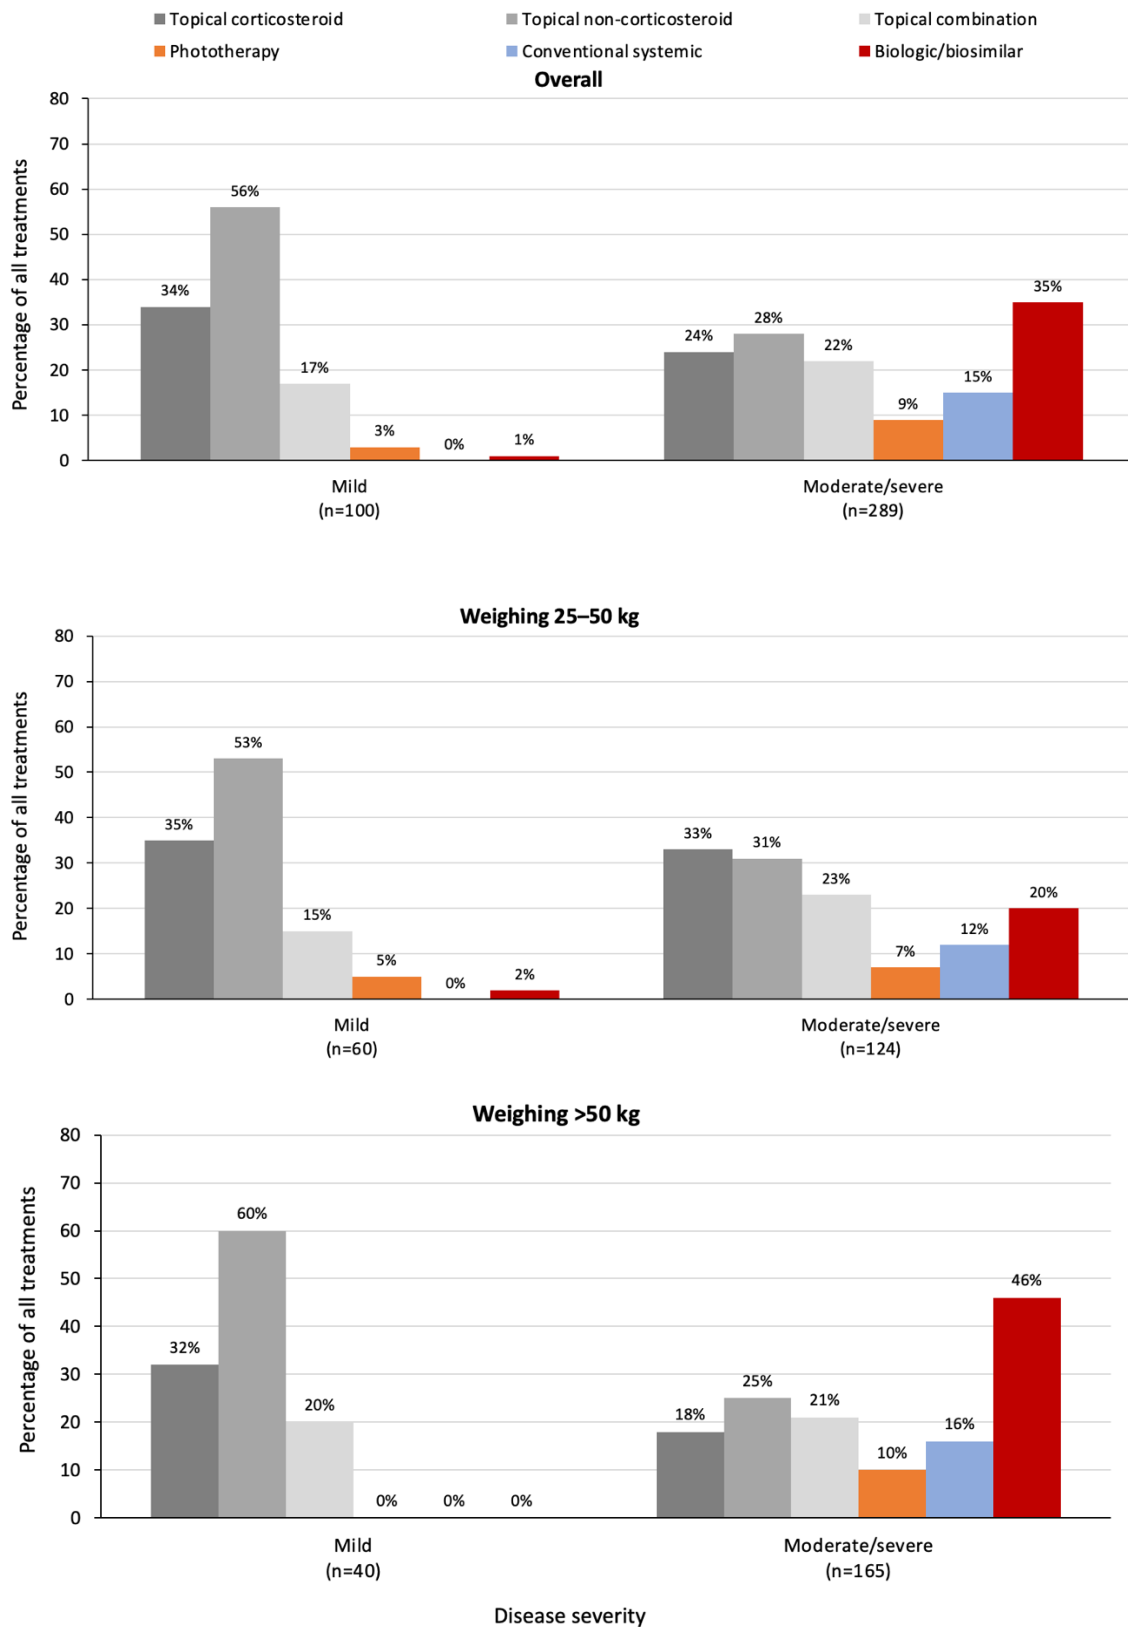

(d) Spain

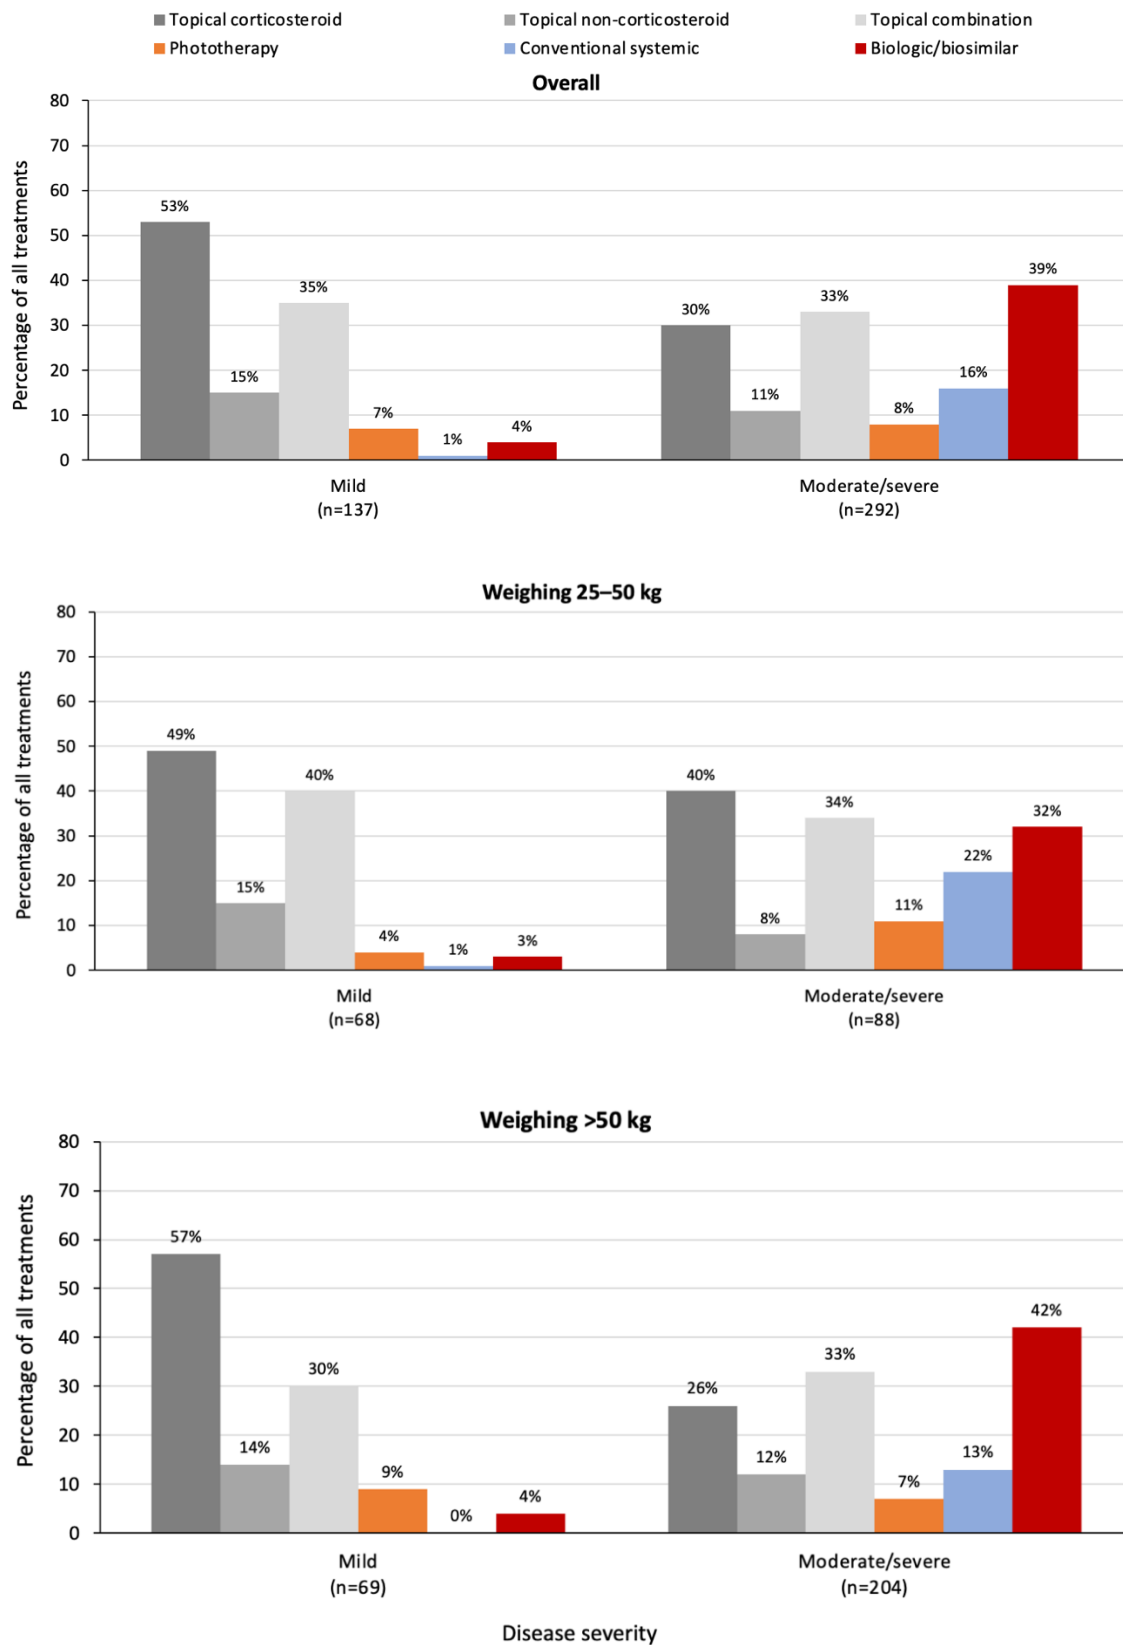

(e) UK

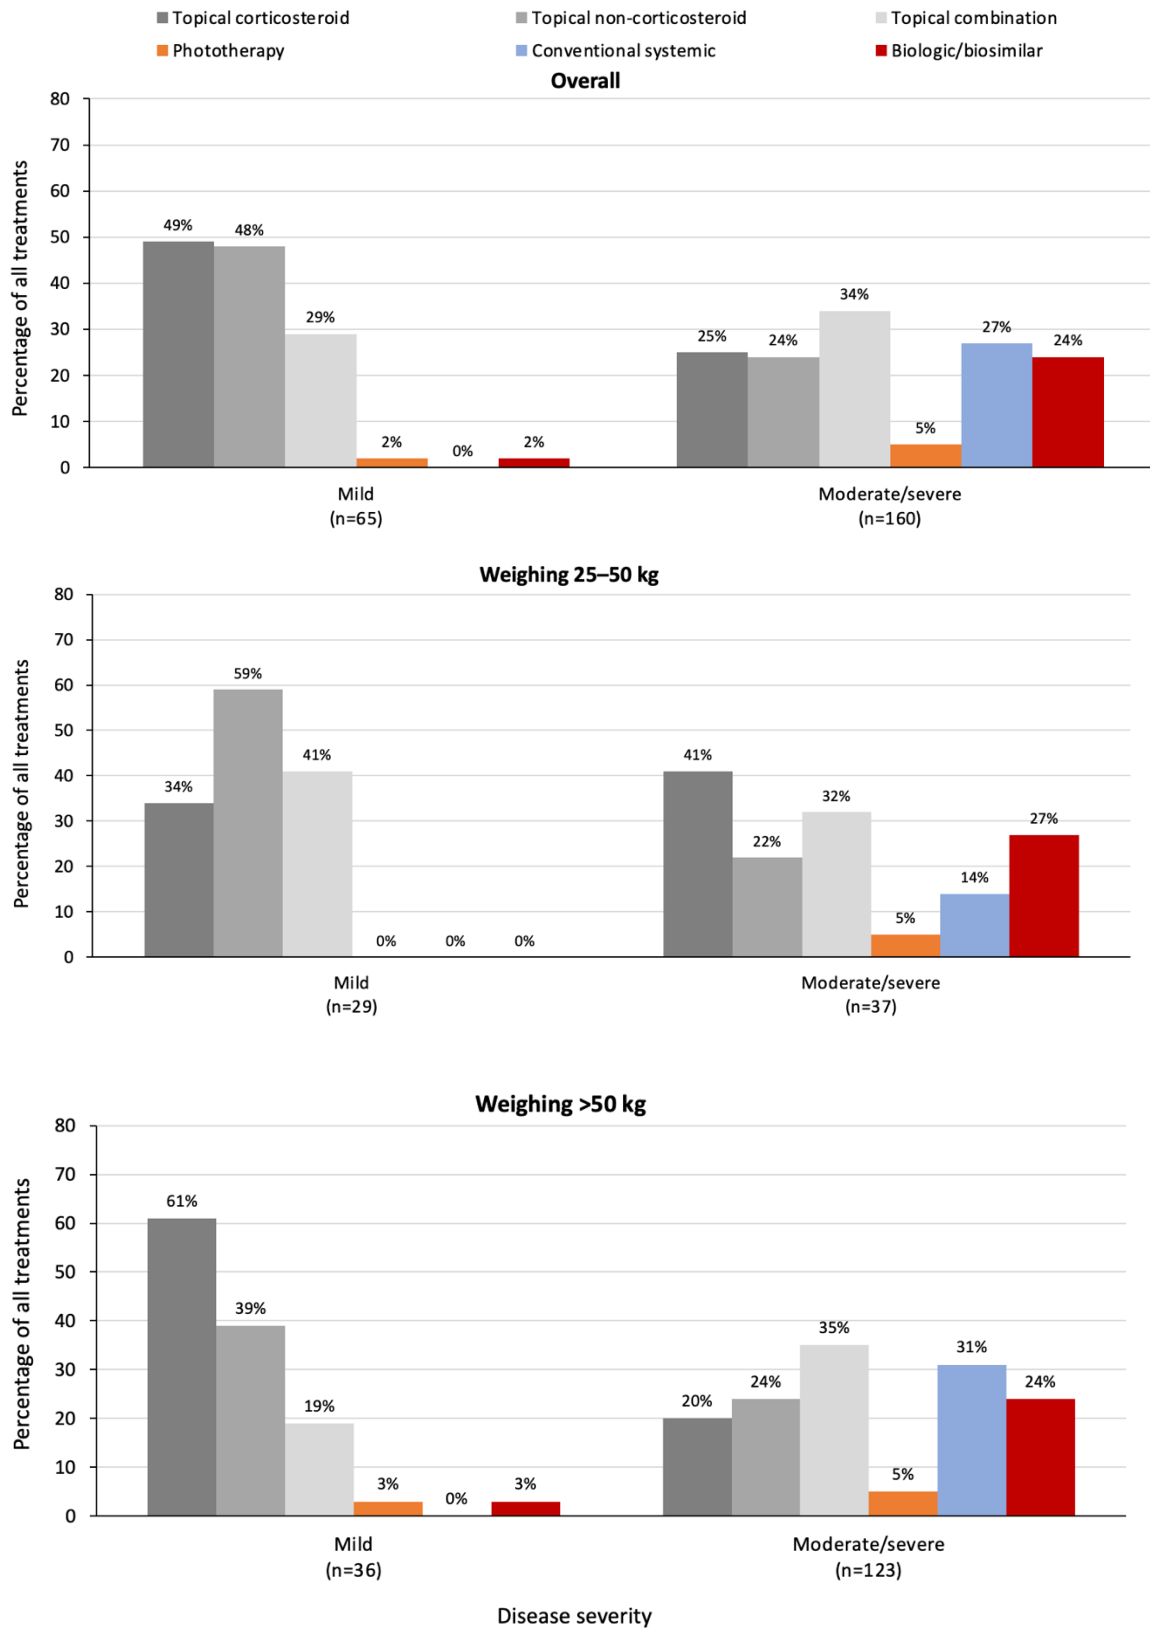

**Supplementary Fig. 3**

Age of patients at biologic initiation, presented as the percentage of patients in each year group, overall and by country. Percentages are slightly under or over 100% due to rounding.

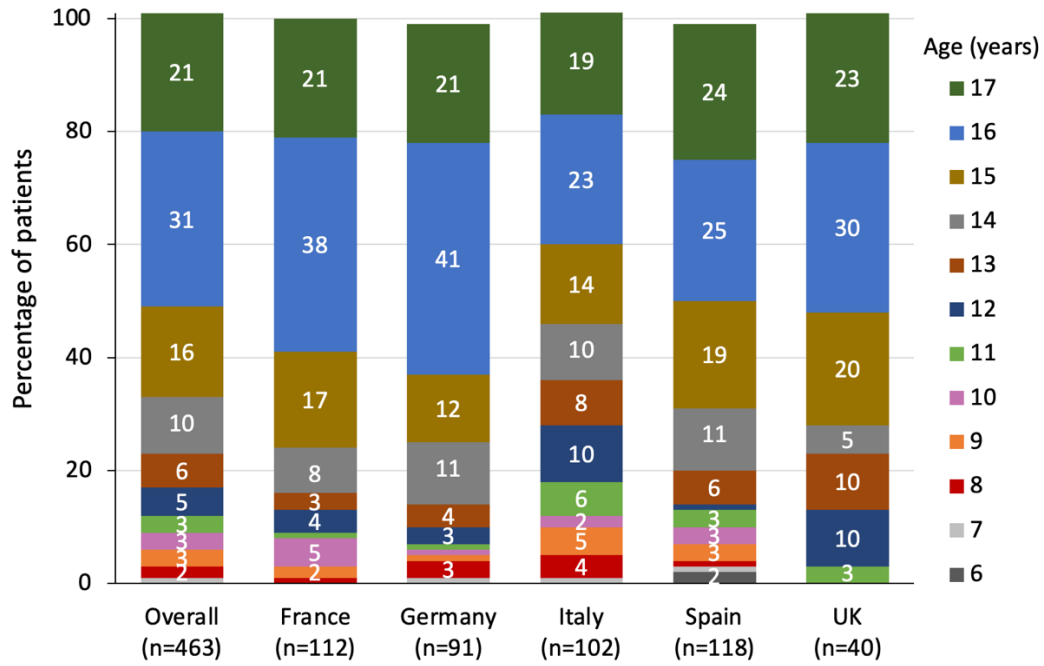



**Supplementary Fig. 4** Current (a) weight and (b) body mass index (BMI) of patients receiving biologics, presented as the percentage of patients in each weight/BMI category, overall and by country. Percentages are slightly under or over 100% due to rounding.

(a)

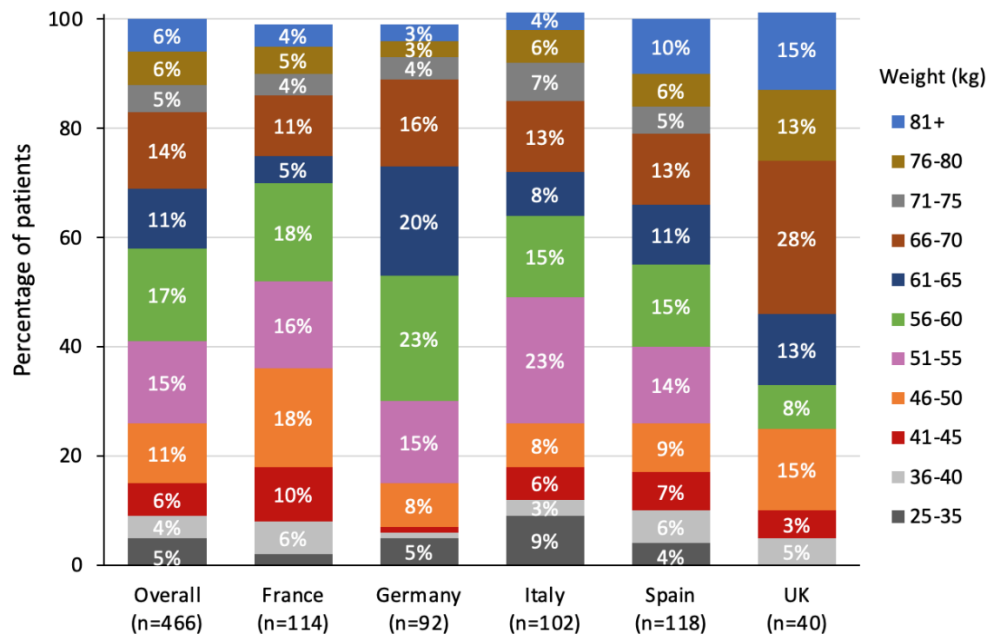

(b)

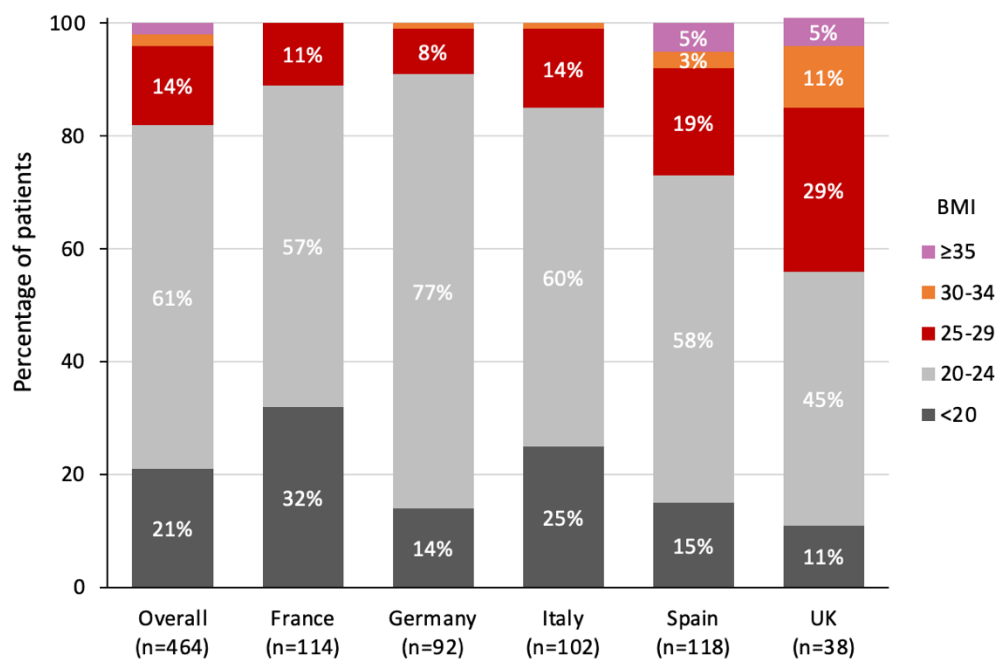

**Supplementary Fig. 5**

Treatments by line of therapy and disease severity at

treatment initiation for patients with a complete treatment history for the overall patient population in each country. Percentages for each regimen line add up to >100% as patients could receive multiple treatments for each regimen line.

(a) France

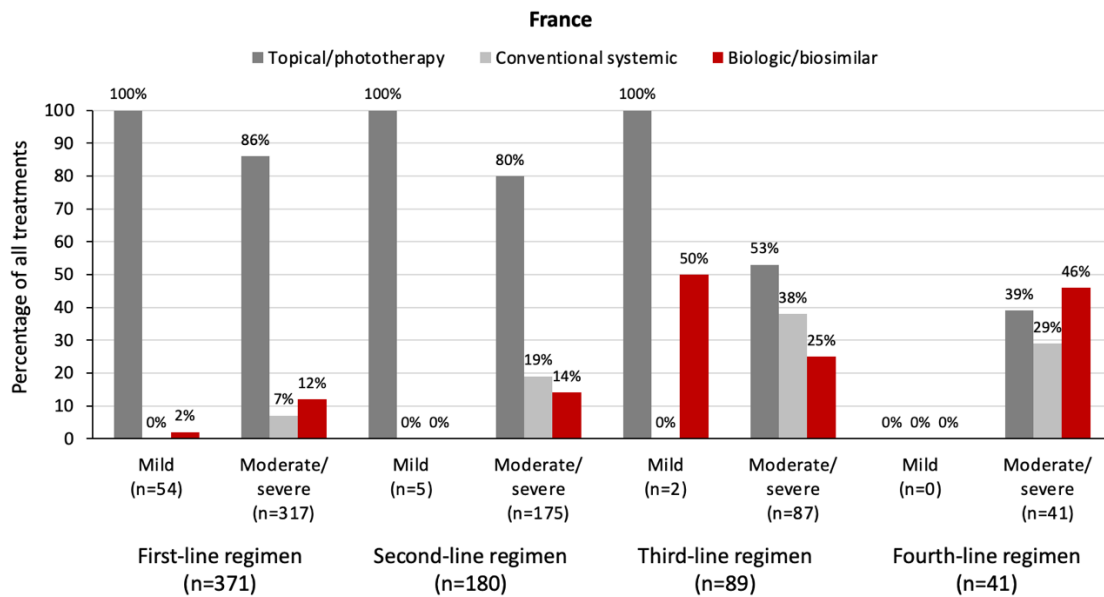

(b) Germany

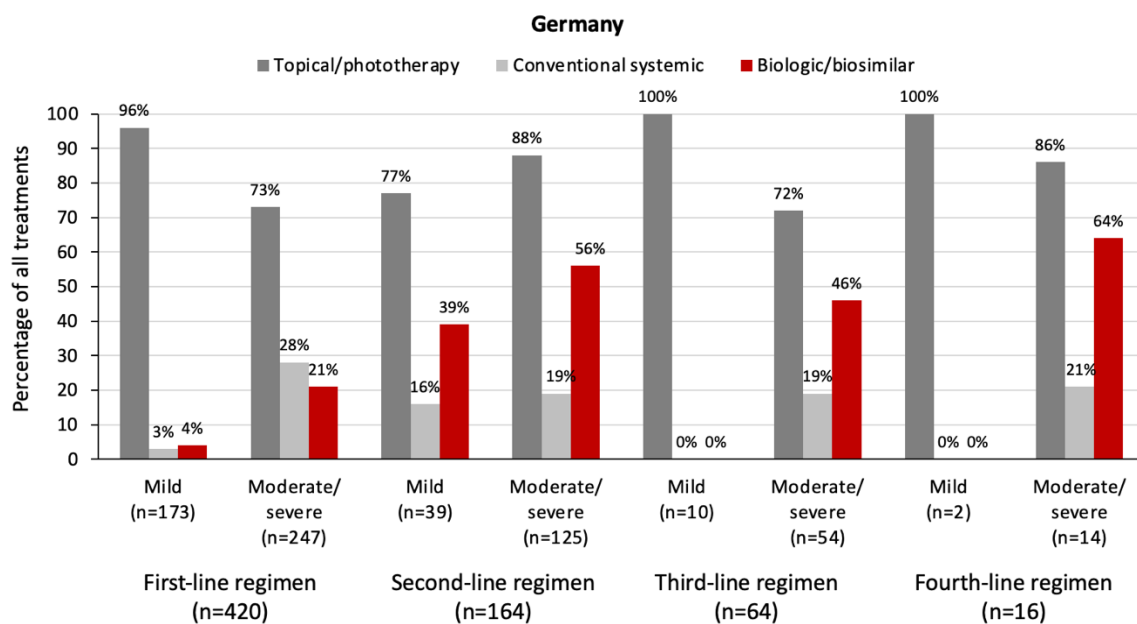

(c) Italy

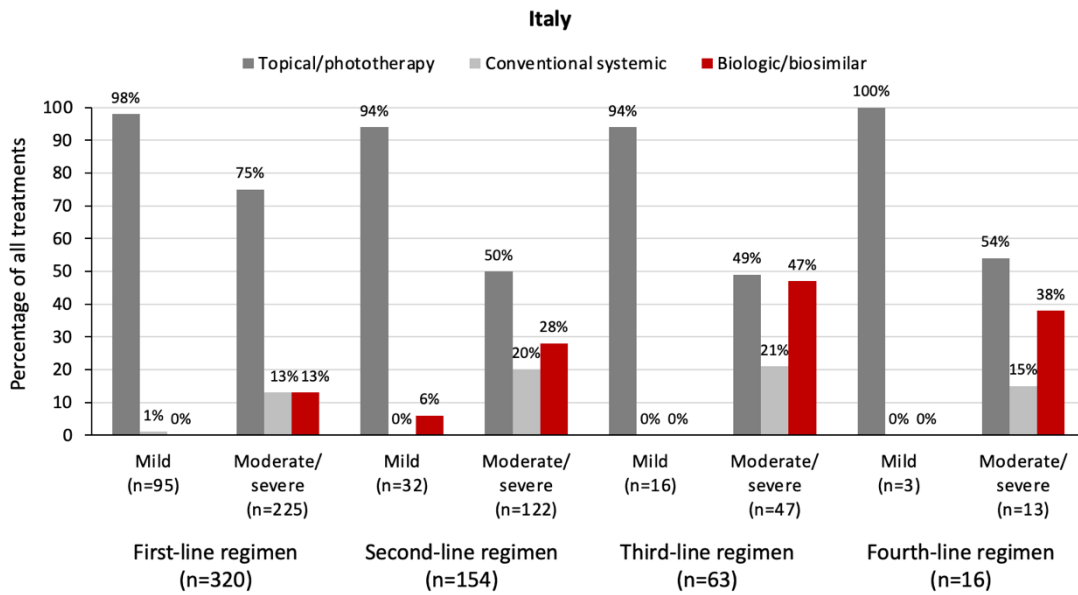

(d) Spain

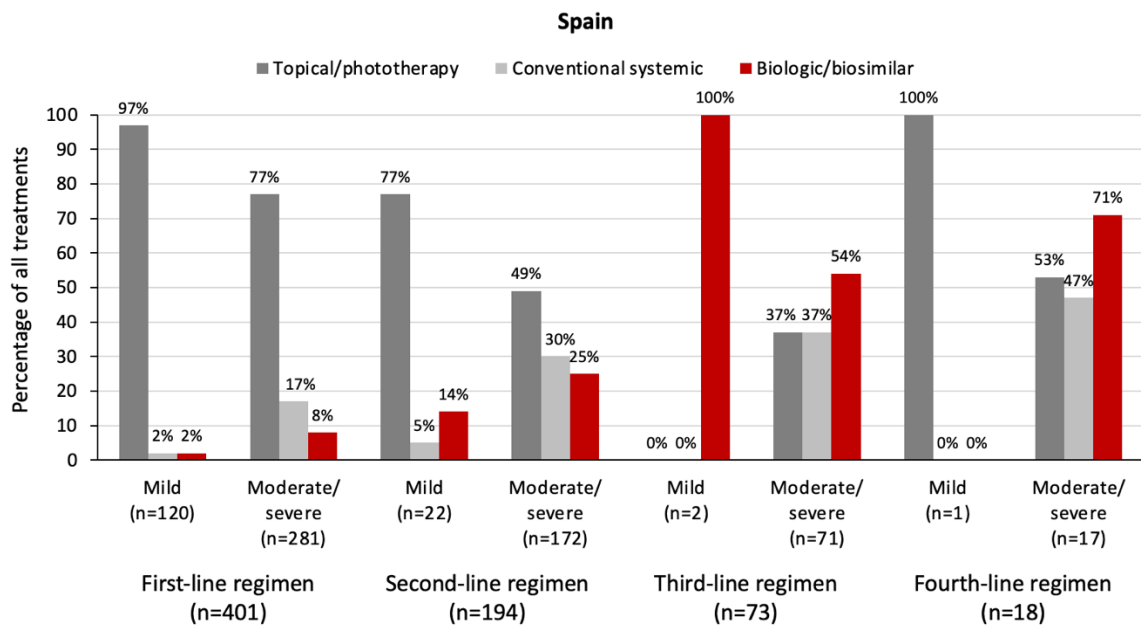

(e) UK

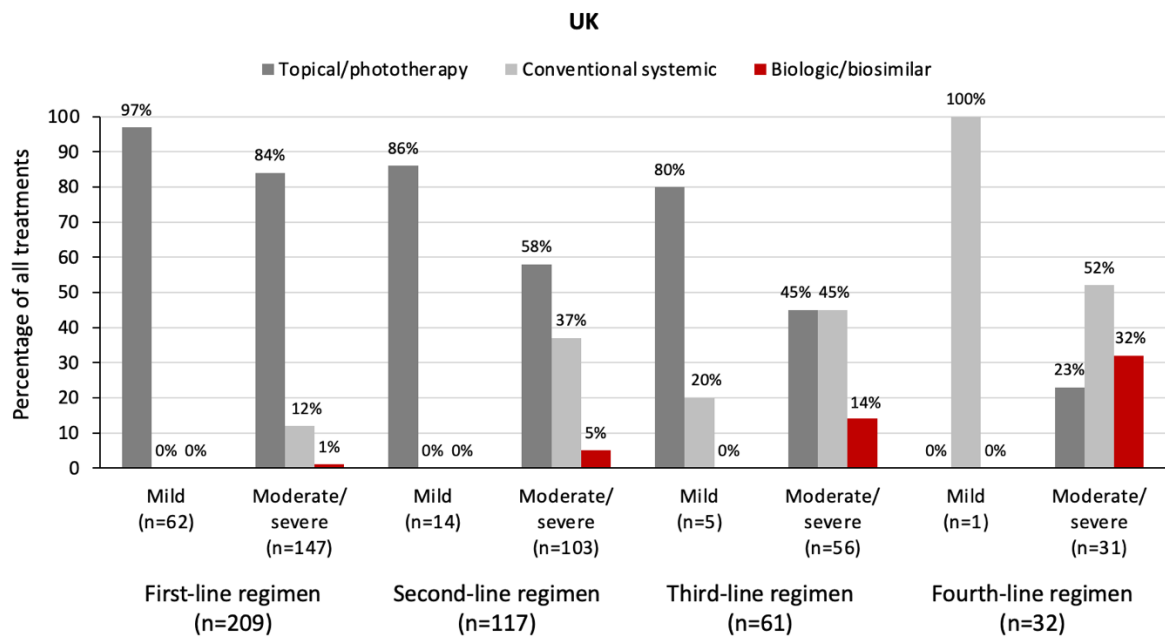

Supplement: MOESM1 [file 23247906]
